# Supplementary material for: Effects of iron homeostasis on epigenetic age acceleration: a two-sample Mendelian randomization study
Source: PubMed Central journal article supplement (PMC10559596; doi:10.1186/s13148-023-01575-w), 2023-10-07
Supplement: 13148_2023_1575_MOESM1_ESM.pdf [file 13148_2023_1575_MOESM1_ESM.pdf]

## SUPPLEMENTAL MATERIAL

### Effects of iron homeostasis on epigenetic age acceleration: A Two-sample Mendelian Randomization Study

Zhihao Wang<sup>1†</sup>, Yi Liu<sup>2†</sup>, Shuxin Zhang<sup>3</sup>, Yunbo Yuan<sup>1</sup>, Siliang Chen<sup>1</sup>, Wenhao Li<sup>1</sup>, Mingrong Zuo<sup>1</sup>, Yufan Xiang<sup>1</sup>, Tengfei Li<sup>1</sup>, Yuan Yang<sup>1</sup>, Yanhui Liu<sup>1\*</sup>

<sup>1</sup> Department of Neurosurgery, West China Hospital, Sichuan University

<sup>2</sup> Department of Thoracic Surgery and Institute of Thoracic Oncology, West China Hospital, Sichuan University

<sup>3</sup> Department of critical care medicine, West China Hospital, Sichuan University

† These authors have contributed equally to this work.

\* Corresponding Author: Yanhui Liu, MD, PhD. (liuyh@scu.edu.cn).

**Supplementary Figure 1.** Procedure of IVs selection.

**Supplementary Figure 2.** MR analyses of epigenetic aging accelerations with 2014 datasets serum iron biomarkers

**Supplementary Figure 3.** MR analyses of epigenetic aging accelerations with 2021 datasets serum iron biomarkers

**Supplementary Figure 4.** MR analyses of epigenetic aging accelerations with organic iron content

**Supplementary Table 1.** Sensitivity analyses of the epigenetic aging acceleration with the serum iron biomarkers in 2014 datasets.

**Supplementary Table 2.** Sensitivity analyses of the epigenetic aging acceleration with the serum iron biomarkers in 2021 datasets.

**Supplementary Table 3.** Sensitivity analyses of the epigenetic aging acceleration with the organic iron content.

**Supplementary table 4-83.** Instrumental SNPs for serum iron biomarkers, organic iron content and epigenetic aging acceleration in the univariable mendelian randomization analysis.

Supplementary Figure 1. Procedure of IVs selection.

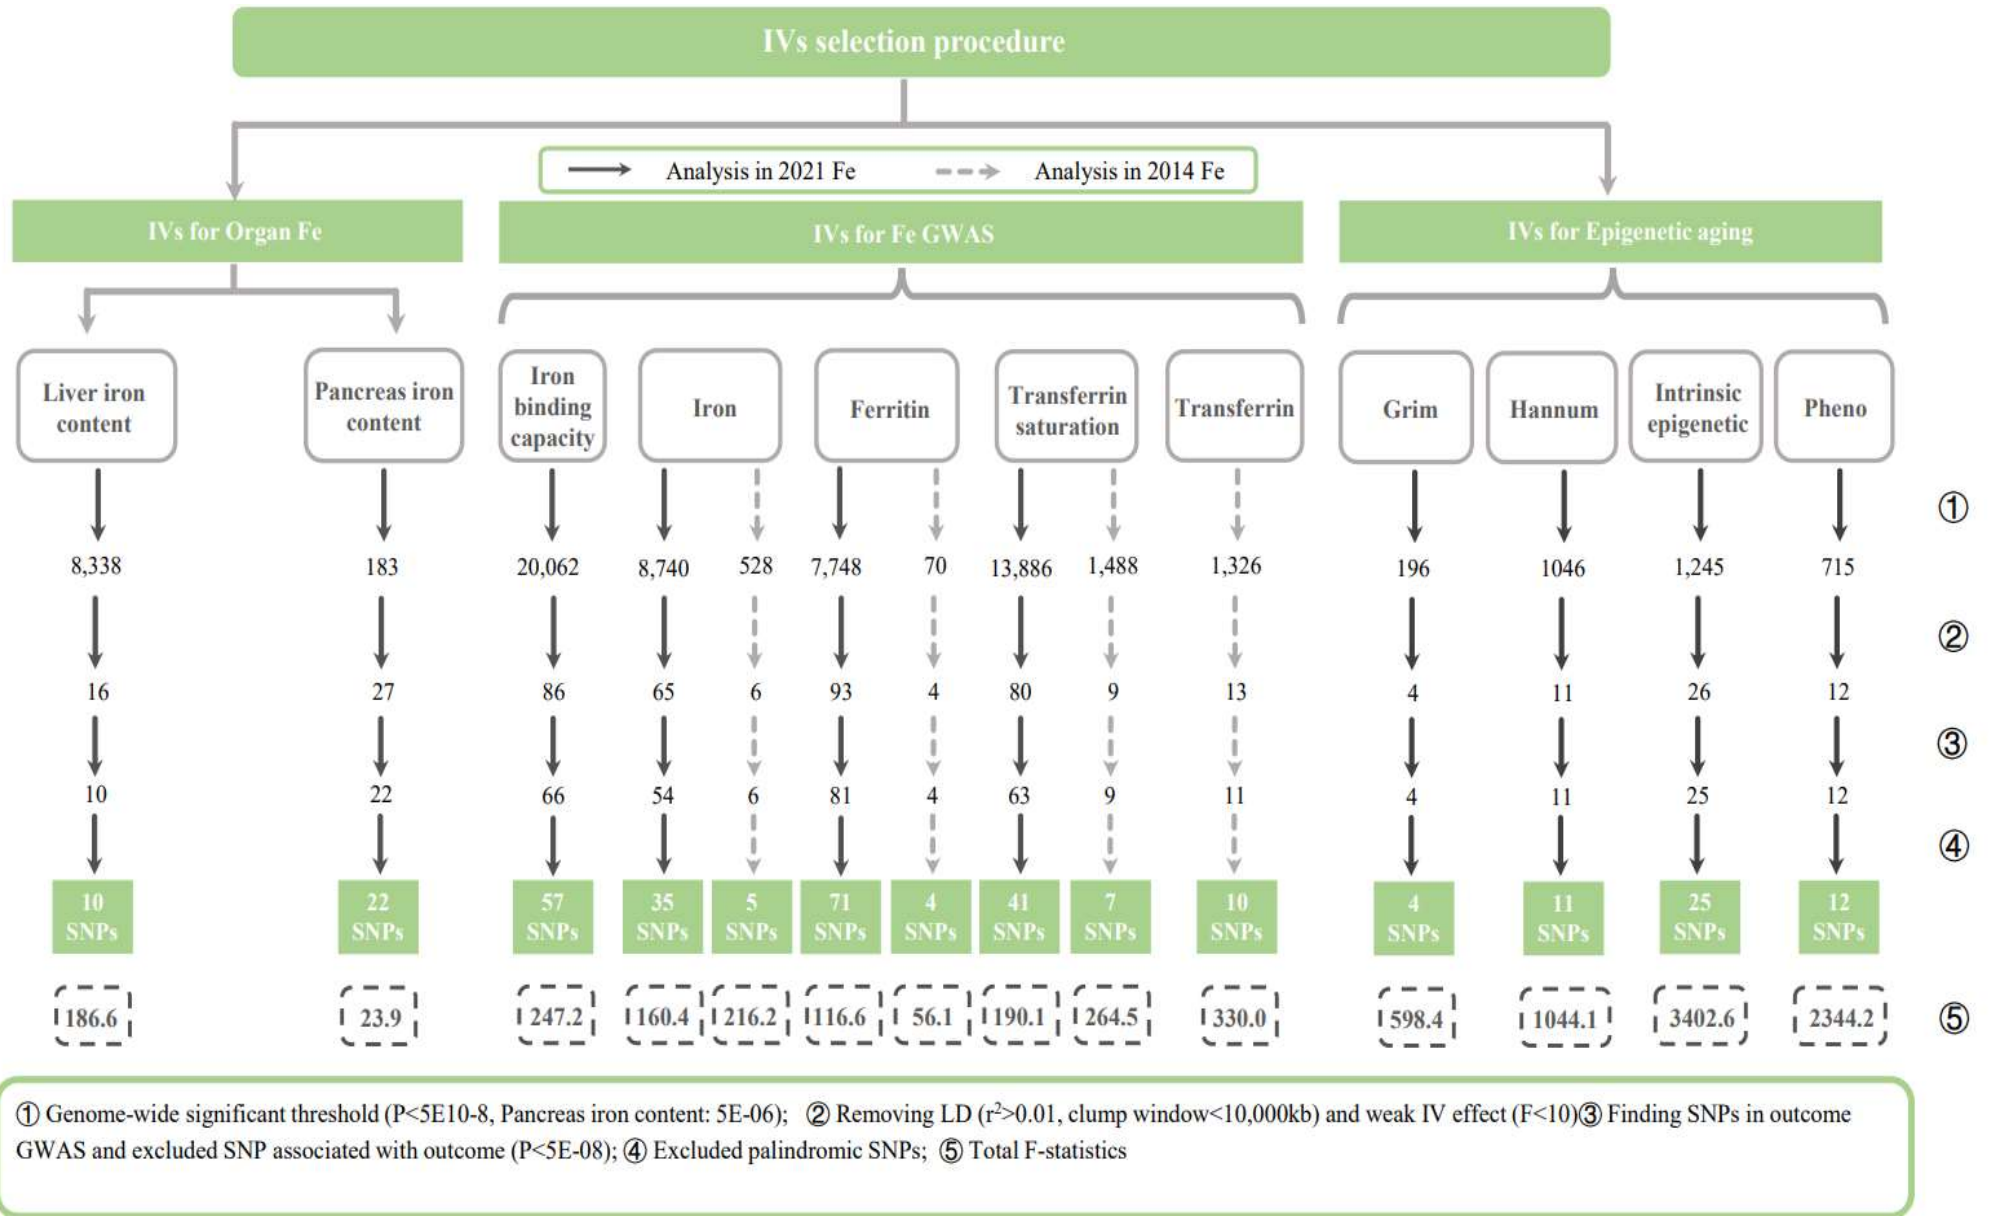

Abbreviations: IVs, instrumental variables; GWAS, genome-wide association study; LD, linkage disequilibrium; SNP, single nucleotide polymorphism.

Supplementary Figure 2. MR analyses of epigenetic aging accelerations with 2014 datasets serum iron biomarkers

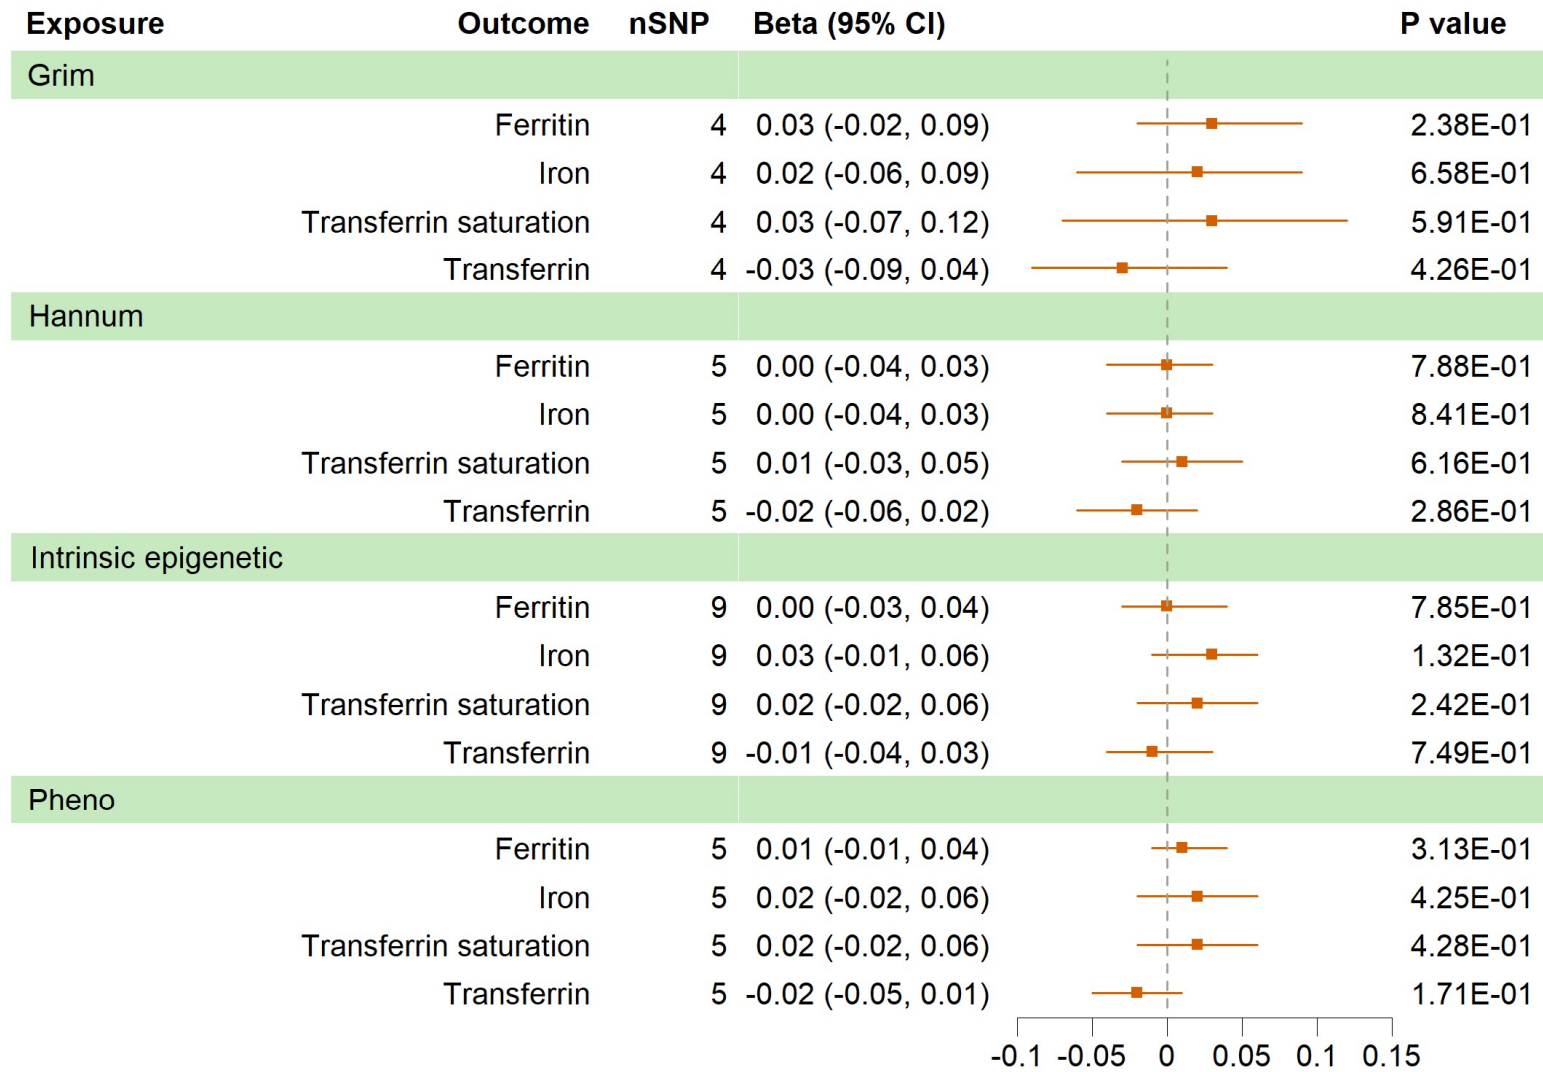

Abbreviations: MR, mendelian randomization; SNP, single nucleotide polymorphism; CI, confidence interval.

**Supplementary Figure 3.** MR analyses of epigenetic aging accelerations with 2021 datasets serum iron biomarkers

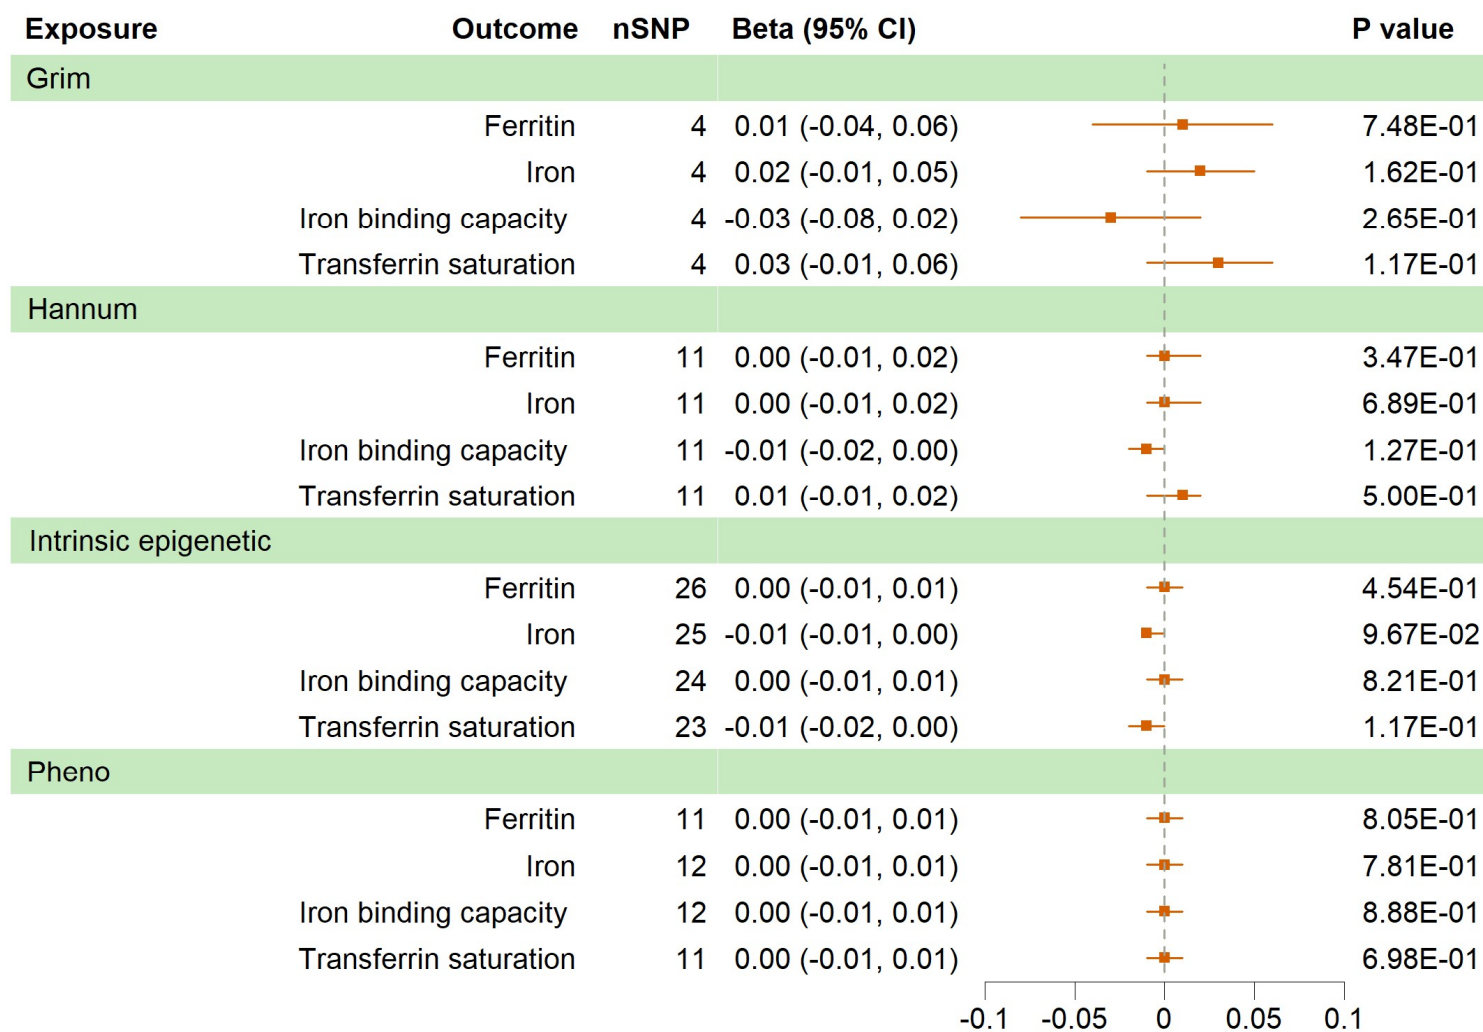

Abbreviations: MR, mendelian randomization; SNP, single nucleotide polymorphism; CI, confidence interval.

**Supplementary Figure 4.** MR analyses of epigenetic aging accelerations with organic iron content

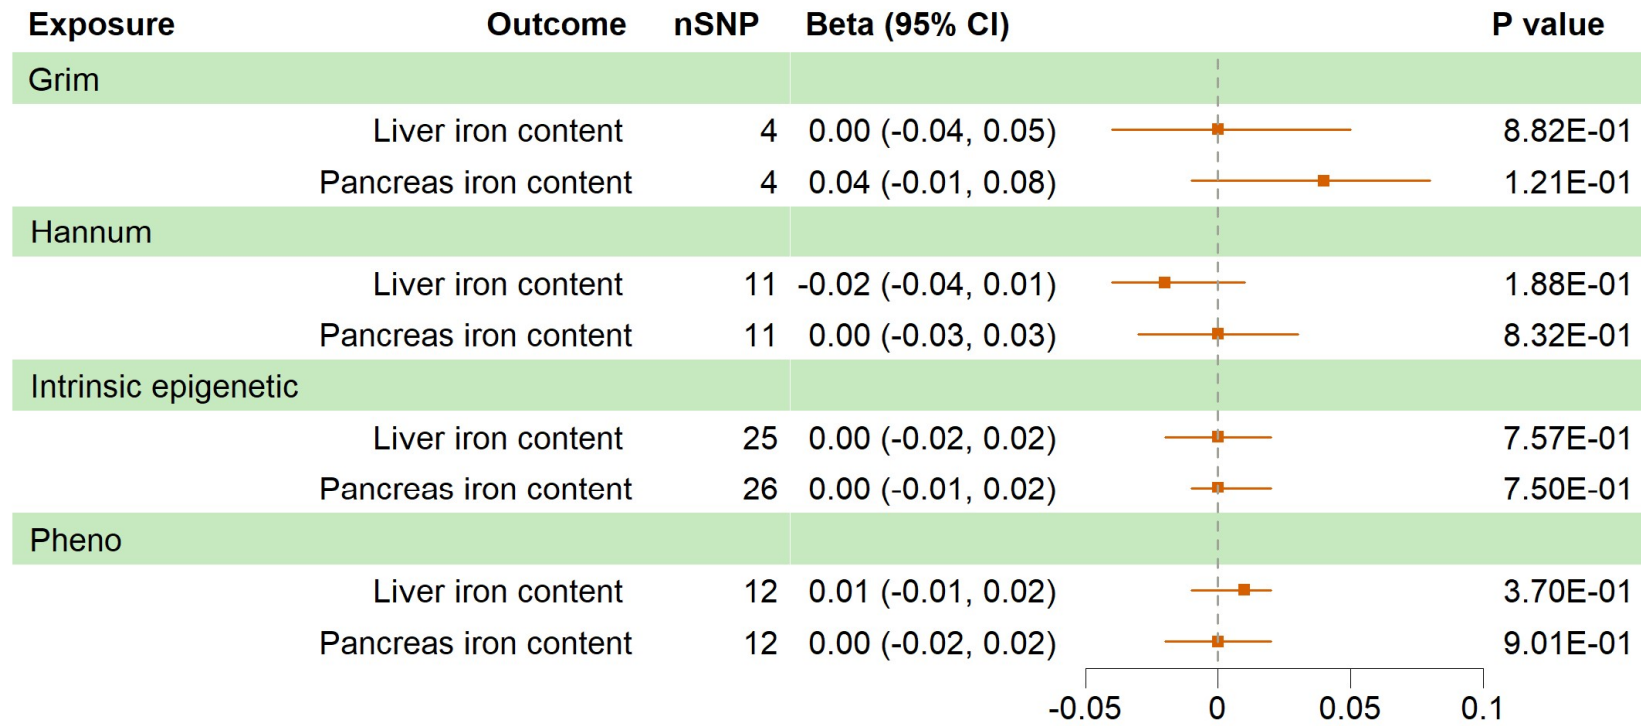

Abbreviations: MR, mendelian randomization; SNP, single nucleotide polymorphism; CI, confidence interval.

**Supplementary Table 1.** Sensitivity analyses of the epigenetic aging acceleration with the serum iron biomarkers in 2014 datasets.

| Exposure | Outcome                | Weighted median     |          | MR-Egger regression |          | Heterogeneity <sup>a</sup>                            | MR-PRESSO outlier detect <sup>b</sup> |                               | Pleiotropy <sup>c</sup> |
|----------|------------------------|---------------------|----------|---------------------|----------|-------------------------------------------------------|---------------------------------------|-------------------------------|-------------------------|
|          |                        | Beta (95% CI)       | P Value  | Beta (95% CI)       | P Value  |                                                       | Beta (95% CI)                         | P Value                       |                         |
| Grim     | Ferritin               | 0.04 (-0.03, 0.1)   | 2.56E-01 | 0.30 (-0.75, 1.35)  | 6.31E-01 | I <sup>2</sup> = 14.5%; Cochrane Q = 4;<br>P = 0.32   | No significant outliers               | Intercept = -0.05; P = 0.667  |                         |
| Grim     | Iron                   | 0.01 (-0.06, 0.08)  | 8.01E-01 | 0.28 (-1.16, 1.71)  | 7.42E-01 | I <sup>2</sup> = 45.3%; Cochrane Q = 5;<br>P = 0.139  | No significant outliers               | Intercept = -0.048; P = 0.756 |                         |
| Grim     | Transferrin Saturation | 0.04 (-0.04, 0.11)  | 3.22E-01 | 0.05 (-1.82, 1.92)  | 9.62E-01 | I <sup>2</sup> = 65.5%; Cochrane Q = 9;<br>P = 0.034  | No significant outliers               | Intercept = -0.005; P = 0.981 |                         |
| Grim     | Transferrin            | -0.05 (-0.12, 0.02) | 1.72E-01 | 0.31 (-0.95, 1.58)  | 6.73E-01 | I <sup>2</sup> = 30.2%; Cochrane Q = 4;<br>P = 0.231  | No significant outliers               | Intercept = -0.064; P = 0.648 |                         |
| Hannum   | Ferritin               | 0.00 (-0.04, 0.04)  | 9.72E-01 | -0.01 (-0.17, 0.14) | 8.85E-01 | I <sup>2</sup> = 0%; Cochrane Q = 1;<br>P = 0.955     | No significant outliers               | Intercept = 0.002; P = 0.929  |                         |
| Hannum   | Iron                   | 0.01 (-0.04, 0.05)  | 7.84E-01 | 0.08 (-0.08, 0.24)  | 4.05E-01 | I <sup>2</sup> = 0%; Cochrane Q = 1;<br>P = 0.840     | No significant outliers               | Intercept = -0.023; P = 0.374 |                         |
| Hannum   | Transferrin Saturation | 0.02 (-0.03, 0.07)  | 4.42E-01 | 0.08 (-0.08, 0.25)  | 3.93E-01 | I <sup>2</sup> = 0%; Cochrane Q = 1;<br>P = 0.881     | No significant outliers               | Intercept = -0.02; P = 0.433  |                         |
| Hannum   | Transferrin            | -0.02 (-0.07, 0.03) | 4.38E-01 | -0.05 (-0.21, 0.12) | 6.28E-01 | I <sup>2</sup> = 0%; Cochrane Q = 1;<br>P = 0.899     | No significant outliers               | Intercept = 0.007; P = 0.787  |                         |
| IE       | Ferritin               | 0.01 (-0.04, 0.05)  | 8.07E-01 | 0.02 (-0.30, 0.34)  | 8.92E-01 | I <sup>2</sup> = 16.5%; Cochrane Q = 10;<br>P = 0.295 | No significant outliers               | Intercept = -0.004; P = 0.913 |                         |
| IE       | Iron                   | 0.02 (-0.02, 0.07)  | 3.51E-01 | 0.20 (-0.13, 0.52)  | 2.68E-01 | I <sup>2</sup> = 22%; Cochrane Q = 10;<br>P = 0.248   | No significant outliers               | Intercept = -0.038; P = 0.332 |                         |
| IE       | Transferrin Saturation | 0.02 (-0.02, 0.07)  | 3.70E-01 | 0.14 (-0.22, 0.49)  | 4.73E-01 | I <sup>2</sup> = 26.8%; Cochrane Q = 11;<br>P = 0.206 | No significant outliers               | Intercept = -0.025; P = 0.544 |                         |
| IE       | Transferrin            | 0.00 (-0.05, 0.04)  | 9.44E-01 | 0.10 (-0.19, 0.40)  | 5.18E-01 | I <sup>2</sup> = 0%; Cochrane Q = 7;<br>P = 0.524     | No significant outliers               | Intercept = -0.024; P = 0.494 |                         |
| Pheno    | Ferritin               | 0.01 (-0.03, 0.04)  | 6.81E-01 | -0.03 (-0.11, 0.04) | 4.55E-01 | I <sup>2</sup> = 1.1%; Cochrane Q = 4;<br>P = 0.400   | No significant outliers               | Intercept = 0.021; P = 0.268  |                         |
| Pheno    | Iron                   | 0.01 (-0.03, 0.05)  | 5.81E-01 | -0.08 (-0.16, 0.00) | 1.53E-01 | I <sup>2</sup> = 39.9%; Cochrane Q = 7;<br>P = 0.155  | No significant outliers               | Intercept = 0.041; P = 0.088  |                         |
| Pheno    | Transferrin Saturation | 0.02 (-0.02, 0.06)  | 2.62E-01 | -0.07 (-0.15, 0.01) | 2.04E-01 | I <sup>2</sup> = 41.1%; Cochrane Q = 7;<br>P = 0.148  | No significant outliers               | Intercept = 0.036; P = 0.116  |                         |
| Pheno    | Transferrin            | -0.01 (-0.05, 0.03) | 5.37E-01 | -0.02 (-0.11, 0.06) | 5.95E-01 | I <sup>2</sup> = 0%; Cochrane Q = 3;                  | No significant outliers               | Intercept = 0.001; P = 0.948  |                         |

<sup>a</sup> Heterogeneity in the random effect IVW methods was reported. <sup>b</sup> MR-PRESSO (NbDistribution = 10,000, P < 0.05). <sup>c</sup> MR-Egger was used to detect Pleiotropy. There is no pleiotropy was observed among all analyses (P>0.05). Abbreviation: CI confidence interval, MR-PRESSO Mendelian Randomization Pleiotropy RESidual Sum and Outlier, IE Intrinsic epigenetic.

**Supplementary Table 2.** Sensitivity analyses of the epigenetic aging acceleration with the serum iron biomarkers in 2021 datasets.

| Exposure | Outcome                | Weighted median     |          | MR-Egger regression |          | Heterogeneity <sup>a</sup>                | MR-PRESSO outlier detect <sup>b</sup> |         | Pleiotropy <sup>c</sup>       |
|----------|------------------------|---------------------|----------|---------------------|----------|-------------------------------------------|---------------------------------------|---------|-------------------------------|
|          |                        | Beta (95% CI)       | P Value  | Beta (95% CI)       | P Value  |                                           | Beta (95% CI)                         | P Value |                               |
| Grim     | Ferritin               | 0.00 (-0.03, 0.02)  | 8.15E-01 | 0.24 (-0.80, 1.28)  | 6.96E-01 | I2 = 87.6%; Cochrane Q = 24;<br>P = 0.001 | No significant outliers               |         | Intercept = -0.043; P = 0.705 |
| Grim     | Iron                   | 0.02 (-0.01, 0.04)  | 2.30E-01 | 0.07 (-0.49, 0.63)  | 8.30E-01 | I2 = 37.7%; Cochrane Q = 5;<br>P = 0.186  | No significant outliers               |         | Intercept = -0.009; P = 0.877 |
| Grim     | Iron binding capacity  | -0.03 (-0.06, 0.00) | 7.78E-02 | -0.54 (-1.23, 0.15) | 2.64E-01 | I2 = 74.2%; Cochrane Q = 12;<br>P = 0.009 | -0.03 (-0.07, 0.01)                   | 0.45    | Intercept = 0.095; P = 0.282  |
| Grim     | Transferrin saturation | 0.02 (-0.01, 0.05)  | 2.45E-01 | 0.36 (-0.20, 0.91)  | 3.34E-01 | I2 = 51.2%; Cochrane Q = 6;<br>P = 0.104  | No significant outliers               |         | Intercept = -0.061; P = 0.364 |
| Hannum   | Ferritin               | 0.01 (-0.01, 0.02)  | 2.90E-01 | 0.00 (-0.03, 0.03)  | 8.62E-01 | I2 = 0%; Cochrane Q = 6;<br>P = 0.791     | No significant outliers               |         | Intercept = 0.002; P = 0.601  |
| Hannum   | Iron                   | 0.01 (-0.01, 0.03)  | 2.78E-01 | -0.01 (-0.05, 0.04) | 7.77E-01 | I2 = 45.2%; Cochrane Q = 18;<br>P = 0.051 | No significant outliers               |         | Intercept = 0.003; P = 0.66   |
| Hannum   | Iron binding capacity  | -0.01 (-0.03, 0.01) | 2.33E-01 | -0.02 (-0.06, 0.02) | 4.27E-01 | I2 = 0%; Cochrane Q = 5;<br>P = 0.916     | No significant outliers               |         | Intercept = 0.002; P = 0.76   |
| Hannum   | Transferrin saturation | 0.01 (-0.01, 0.03)  | 3.39E-01 | 0.00 (-0.05, 0.05)  | 1.00E+00 | I2 = 38.4%; Cochrane Q = 16;<br>P = 0.093 | No significant outliers               |         | Intercept = 0.002; P = 0.815  |
| IE       | Ferritin               | 0.00 (-0.01, 0.01)  | 4.23E-01 | 0.00 (-0.02, 0.02)  | 8.72E-01 | I2 = 53.5%; Cochrane Q = 54;<br>P = 0.001 | 0.00 (0.00, 0.00)                     | 1.00    | Intercept = 0.001; P = 0.896  |
| IE       | Iron                   | -0.01 (-0.02, 0.00) | 9.27E-02 | 0.00 (-0.02, 0.02)  | 7.61E-01 | I2 = 15.1%; Cochrane Q = 28;<br>P = 0.249 | No significant outliers               |         | Intercept = -0.001; P = 0.712 |
| IE       | Iron binding capacity  | 0.00 (-0.02, 0.01)  | 6.96E-01 | -0.01 (-0.03, 0.02) | 5.80E-01 | I2 = 33%; Cochrane Q = 34; P = 0.061      | No significant outliers               |         | Intercept = 0.002; P = 0.612  |
| IE       | Transferrin saturation | -0.01 (-0.02, 0.00) | 2.02E-01 | 0.00 (-0.02, 0.03)  | 8.15E-01 | I2 = 47%; Cochrane Q = 42; P = 0.007      | -0.02 (-0.02, -0.02)                  | 0.00    | Intercept = -0.004; P = 0.345 |
| Pheno    | Ferritin               | 0.00 (-0.01, 0.01)  | 6.60E-01 | 0.00 (-0.03, 0.02)  | 8.32E-01 | I2 = 39.2%; Cochrane Q = 16;<br>P = 0.087 | No significant outliers               |         | Intercept = 0.001; P = 0.888  |

|       |                        |                     |          |                    |          |                                           |                         |                              |
|-------|------------------------|---------------------|----------|--------------------|----------|-------------------------------------------|-------------------------|------------------------------|
| Pheno | Iron                   | 0.00 (-0.01, 0.01)  | 7.78E-01 | 0.00 (-0.03, 0.03) | 9.79E-01 | I2 = 37.3%; Cochrane Q = 18;<br>P = 0.093 | No significant outliers | Intercept = 0.001; P = 0.898 |
| Pheno | Iron binding capacity  | 0.00 (-0.01, 0.01)  | 9.53E-01 | 0.01 (-0.02, 0.03) | 7.01E-01 | I2 = 0%; Cochrane Q = 7;<br>P = 0.837     | No significant outliers | Intercept = -0.002; P = 0.72 |
| Pheno | Transferrin saturation | -0.01 (-0.02, 0.00) | 1.56E-01 | 0.00 (-0.04, 0.03) | 7.53E-01 | I2 = 16.3%; Cochrane Q = 12;<br>P = 0.289 | No significant outliers | Intercept = 0.001; P = 0.844 |

<sup>a</sup> Heterogeneity in the random effect IVW methods was reported. <sup>b</sup> MR-PRESSO (NbDistribution = 10,000, P < 0.05). <sup>c</sup> MR-Egger was used to detect Pleiotropy. There is no pleiotropy was observed among all analyses (P>0.05). Abbreviation: CI confidence interval, MR-PRESSO Mendelian Randomization Pleiotropy RESidual Sum and Outlier, IE Intrinsic epigenetic.

**Supplementary Table 3.** Sensitivity analyses of the epigenetic aging acceleration with the organic iron content.

| Exposure | Outcome               | Weighted median     |          | MR-Egger regression |          | Heterogeneity <sup>a</sup>                | MR-PRESSO outlier detect <sup>b</sup> |                               | Pleiotropy <sup>c</sup>       |
|----------|-----------------------|---------------------|----------|---------------------|----------|-------------------------------------------|---------------------------------------|-------------------------------|-------------------------------|
|          |                       | Beta (95% CI)       | P Value  | Beta (95% CI)       | P Value  |                                           | Beta (95% CI)                         | P Value                       |                               |
| Grim     | Liver iron content    | 0.02 (-0.03, 0.07)  | 5.03E-01 | -0.26 (-1.05, 0.54) | 5.91E-01 | I2 = 4.5%; Cochrane Q = 3;<br>P = 0.370   | No significant outliers               | Intercept = 0.048; P = 0.586  |                               |
| Grim     | Pancreas iron content | 0.04 (-0.02, 0.09)  | 1.65E-01 | -0.26 (-1.05, 0.52) | 5.78E-01 | I2 = 0%; Cochrane Q = 1;<br>P = 0.888     | No significant outliers               | Intercept = 0.056; P = 0.530  |                               |
| Hannum   | Liver iron content    | -0.02 (-0.05, 0.01) | 2.67E-01 | 0.02 (-0.06, 0.09)  | 6.80E-01 | I2 = 34.8%; Cochrane Q = 15;<br>P = 0.120 | No significant outliers               | Intercept = -0.010; P = 0.368 |                               |
| Hannum   | Pancreas iron content | -0.01 (-0.05, 0.03) | 6.06E-01 | 0.02 (-0.06, 0.11)  | 6.27E-01 | I2 = 31.3%; Cochrane Q = 15;<br>P = 0.149 | No significant outliers               | Intercept = -0.006; P = 0.656 |                               |
| IE       | Liver iron content    | 0.01 (-0.01, 0.02)  | 6.06E-01 | 0.02 (-0.03, 0.07)  | 4.87E-01 | I2 = 50.1%; Cochrane Q = 48;<br>P = 0.002 | 0.01 (-0.01, 0.03)                    | 2.21E-01                      | Intercept = -0.004; P = 0.530 |
| IE       | Pancreas iron content | 0.00 (-0.02, 0.03)  | 6.64E-01 | 0.01 (-0.04, 0.05)  | 7.62E-01 | I2 = 22.9%; Cochrane Q = 32;<br>P = 0.146 | No significant outliers               | Intercept = -0.001; P = 0.841 |                               |
| Pheno    | Liver iron content    | 0.01 (-0.01, 0.03)  | 2.53E-01 | -0.01 (-0.06, 0.04) | 6.81E-01 | I2 = 6.1%; Cochrane Q = 12;<br>P = 0.385  | No significant outliers               | Intercept = 0.007; P = 0.449  |                               |
| Pheno    | Pancreas iron content | 0.00 (-0.03, 0.02)  | 8.37E-01 | -0.02 (-0.07, 0.03) | 5.10E-01 | I2 = 0%; Cochrane Q = 10;<br>P = 0.564    | No significant outliers               | Intercept = 0.007; P = 0.454  |                               |

<sup>a</sup> Heterogeneity in the random effect IVW methods was reported. <sup>b</sup> MR-PRESSO (NbDistribution = 10,000, P < 0.05). <sup>c</sup> MR-Egger was used to detect Pleiotropy. There is no pleiotropy was observed among all analyses (P>0.05). Abbreviation: CI confidence interval, MR-PRESSO Mendelian Randomization Pleiotropy RESidual Sum and Outlier, IE Intrinsic epigenetic.

**Supplementary table 4-83:** See supplementary file: Supplementary table 4-83.xlsx
